# Supplementary material for: Mendelian Randomization Reveals: Triglycerides and Sensorineural Hearing Loss
Source: MDPI journal article supplement (doi:10.3390/bioengineering11050438), 2024-04-29
Supplement: s1 [file s1]

**Table S1** Basic information of the GWAS database in the two-sample MR study

| Name | ID                   | Sample size | Race     | Number of SNPs | Year |
|------|----------------------|-------------|----------|----------------|------|
| TG   | ebi-a-GCST90018975   | 343992      | European | 19052580       | 2021 |
| TG   | ieu-b-111            | 441016      | European | 12321875       | 2020 |
| SNHL | finn-b-H8_HL_SEN_NAS | 212544      | European | 16380454       | 2021 |
