# Supplementary material for: Mendelian Randomization Reveals: Triglycerides and Sensorineural Hearing Loss
Source: MDPI journal article supplement (doi:10.3390/bioengineering11050438), 2024-04-29
Supplement: s1 [file s1]

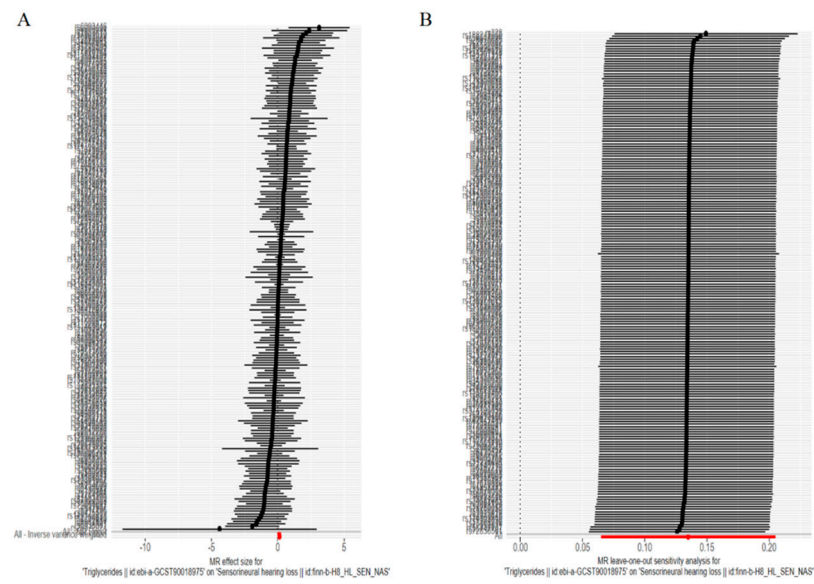

**Figures S1 Related results in the initial MR analysis:**(A) Forest plots illustrating the MR results for TG and SNHL; (B) Leave-one-out analysis of the MR results for TG and SNHL.

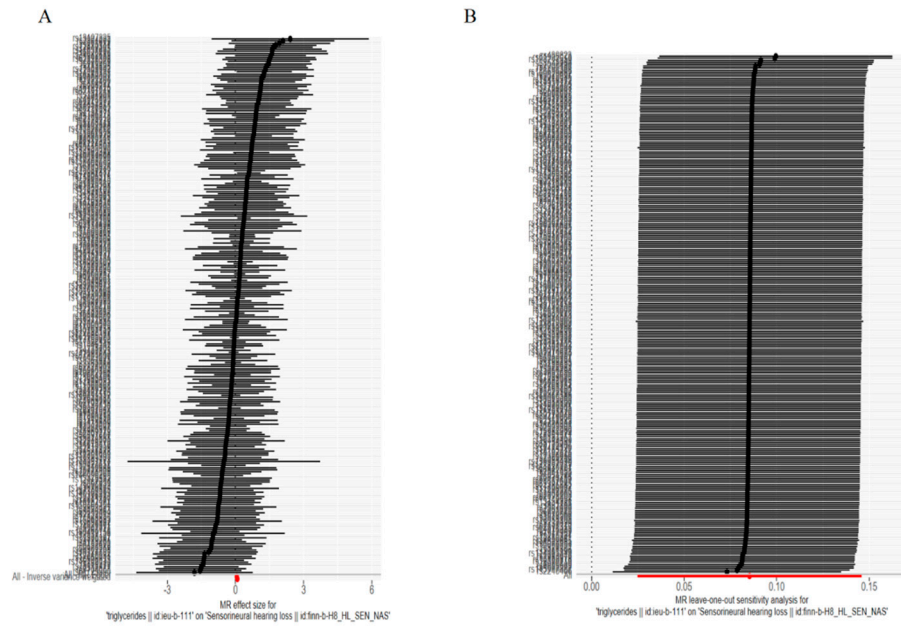

**Figures S2 Related results in the initial MR analysis:**(A) Forest plots illustrating the MR results for TG and SNHL; (B) Leave-one-out analysis of the MR results for TG and SNHL.
